# Supplementary material for: Limited Effects of Class II Transactivator-Based Immunotherapy in Murine and Human Glioblastoma
Source: MDPI journal article supplement (doi:10.3390/cancers16010193), 2023-12-30

SUPPLEMENTARY FIGURE S1. Western blot results showing CIITA expression in -WT versus -CIITA (a) GL261 murine cells and (c) U87, GM2, GM3, PGB13 and PGB-14 human (primary) glioblastoma cells. (b) FACS data indicating high IA/IE (MHC-II antibody) after transfection with the CIITA plasmid versus low IA/IE expression in wildtype cells.

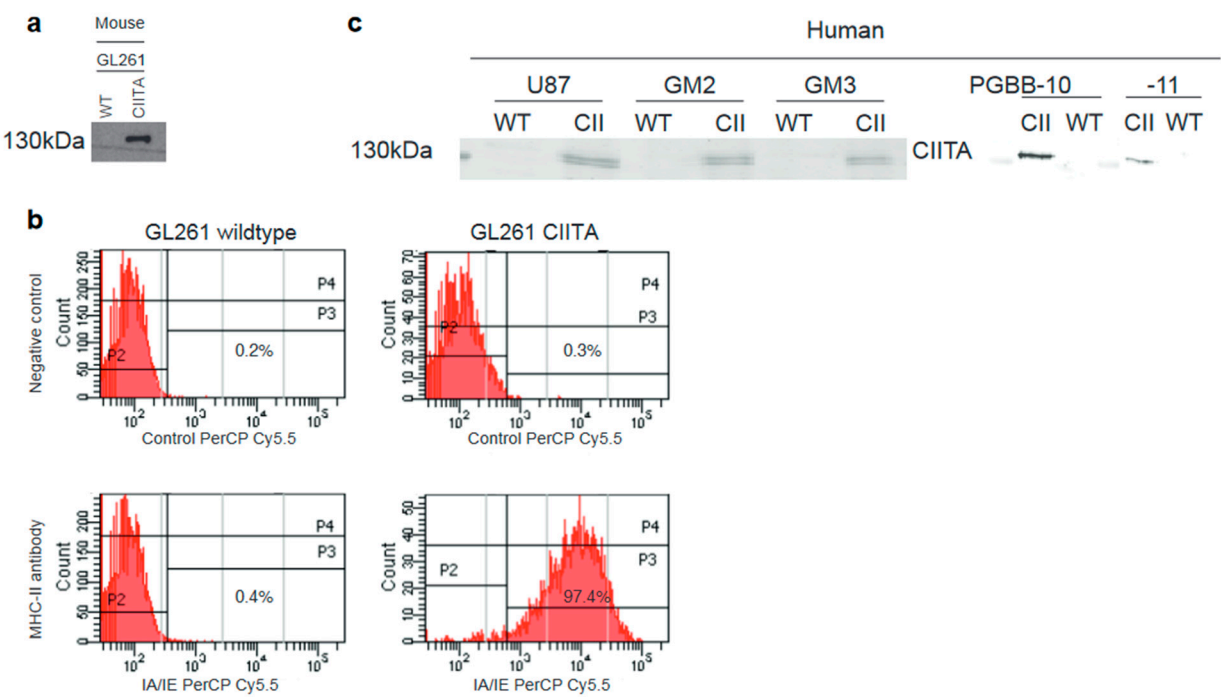

SUPPLEMENTARY TABLE S1. Histopathological diagnosis of glioma used for isolation of tumor-associated myeloid cells, tumor-infiltrating lymphocytes and NK-cells in co-culture experiments.

| Patient | Histopathology                             | Experiment         |
|---------|--------------------------------------------|--------------------|
| PGB1    | Glioblastoma WHO grade IV                  | TIL experiment     |
| PGB2    | Glioblastoma WHO grade IV                  | TIL experiment     |
| PGB3    | Glioblastoma WHO grade IV                  | TAM experiment     |
| PGB4    | Glioblastoma WHO grade IV                  | TAM experiment     |
| PGB5    | Glioblastoma WHO grade IV                  | TAM experiment     |
| PGB6    | Glioblastoma WHO grade IV                  | TAM experiment     |
| PGB7    | Glioblastoma WHO grade IV                  | TAM experiment     |
| PGB8    | Glioblastoma WHO grade IV                  | TAM experiment     |
| PGB9    | Diffuse astrocytoma WHO II                 | TAM experiment     |
| PGB10   | Diffuse low grade glioma WHO II            | TAM experiment     |
| PGB11   | Gemistocytair astrocytoom WHO II           | TAM experiment     |
| PGB12   | Diffuse astrocytoma WHO II                 | TAM experiment     |
| PGB13   | Glioblastoma WHO grade IV                  | NK-cell experiment |
| PGB14   | Anaplastic oligodendroglioma WHO grade III | NK-cell experiment |
| PGB15   | Glioblastoma WHO grade IV                  | NK-cell experiment |
| PGB16   | Glioblastoma WHO grade IV                  | NK-cell experiment |
| PGB17   | Low grade glioma WHO grade II              | NK-cell experiment |

SUPPLEMENTARY FIGURE S2. (a) CIITA and HLA-DR expression in U87-WT and U87-CIITA cells after co-culture with TAM. (b) TAM relative gene expression after co-culture differentiating between glioblastoma-derived (GBM) versus low-grade glioma derived (LGG) TAM. (c) TAM gene expression Each bar represents the mean  $\pm$  SD relative gene expression with separate data points.

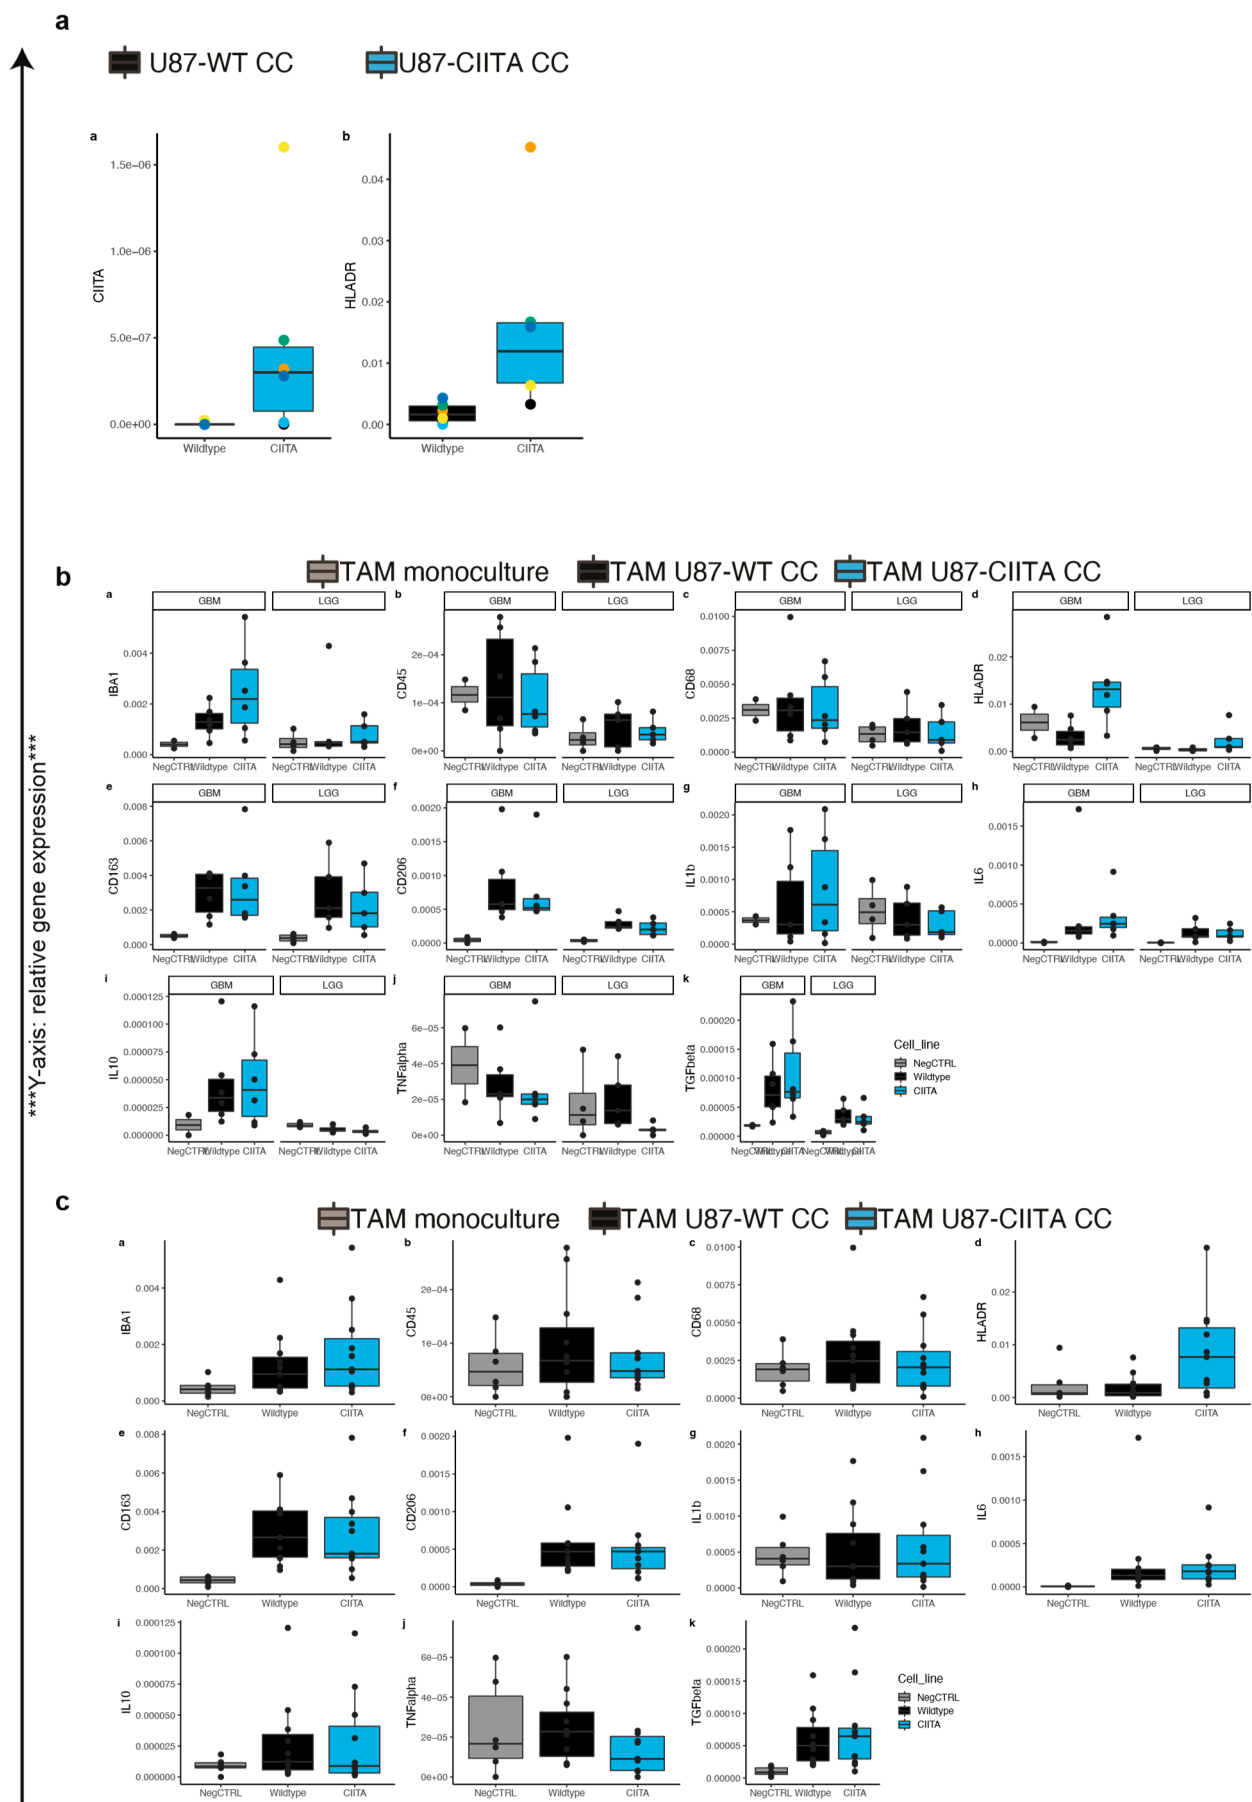

SUPPLEMENTARY FIGURE S3. (A) RT-qPCR analyzed relative gene expression of NK-cell related genes after co-culture with U87 (NK-cell markers (A) or tumor cell markers (B) or GM2 NK (C) versus tumor (D). Each bar represents the mean  $\pm$  SD relative gene expression with separate data points.

Tumor-infiltrating NK cells

■ NK U87 or VC3-WT CC

■ NK U87 or VC3-CIITA CC

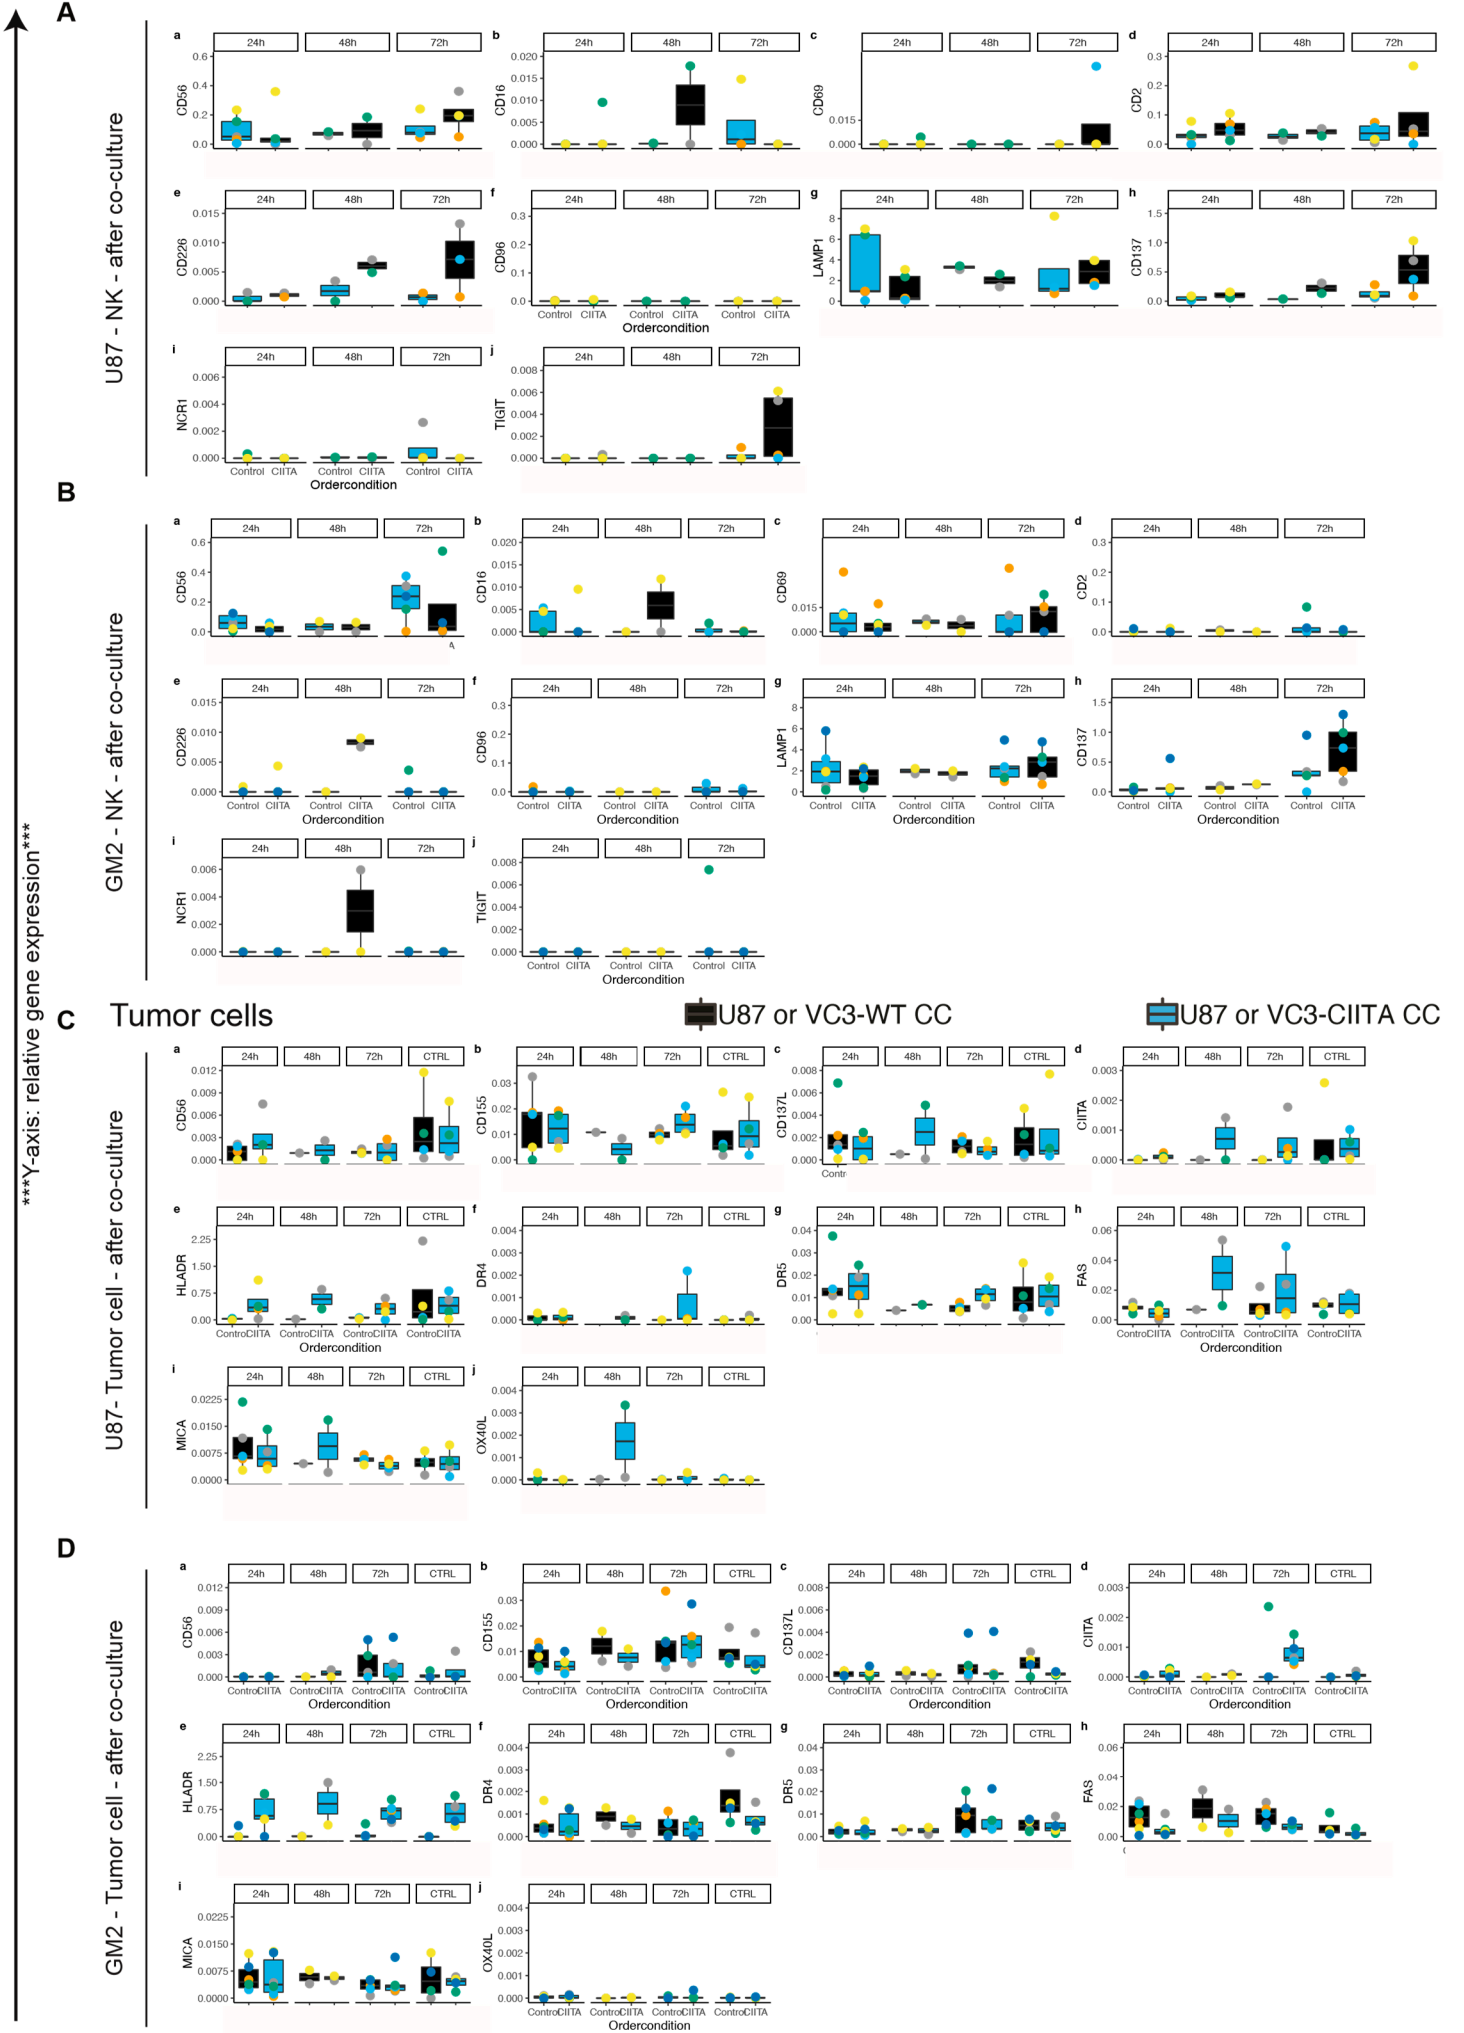

SUPPLEMENTARY FIGURE S4. (A) RT-qPCR analyzed relative gene expression of tumor-infiltrating lymphocytes. TIL-related genes (A) or tumor related genes \ (B) Each bar represents the mean  $\pm$  SD relative gene expression with separate data points.

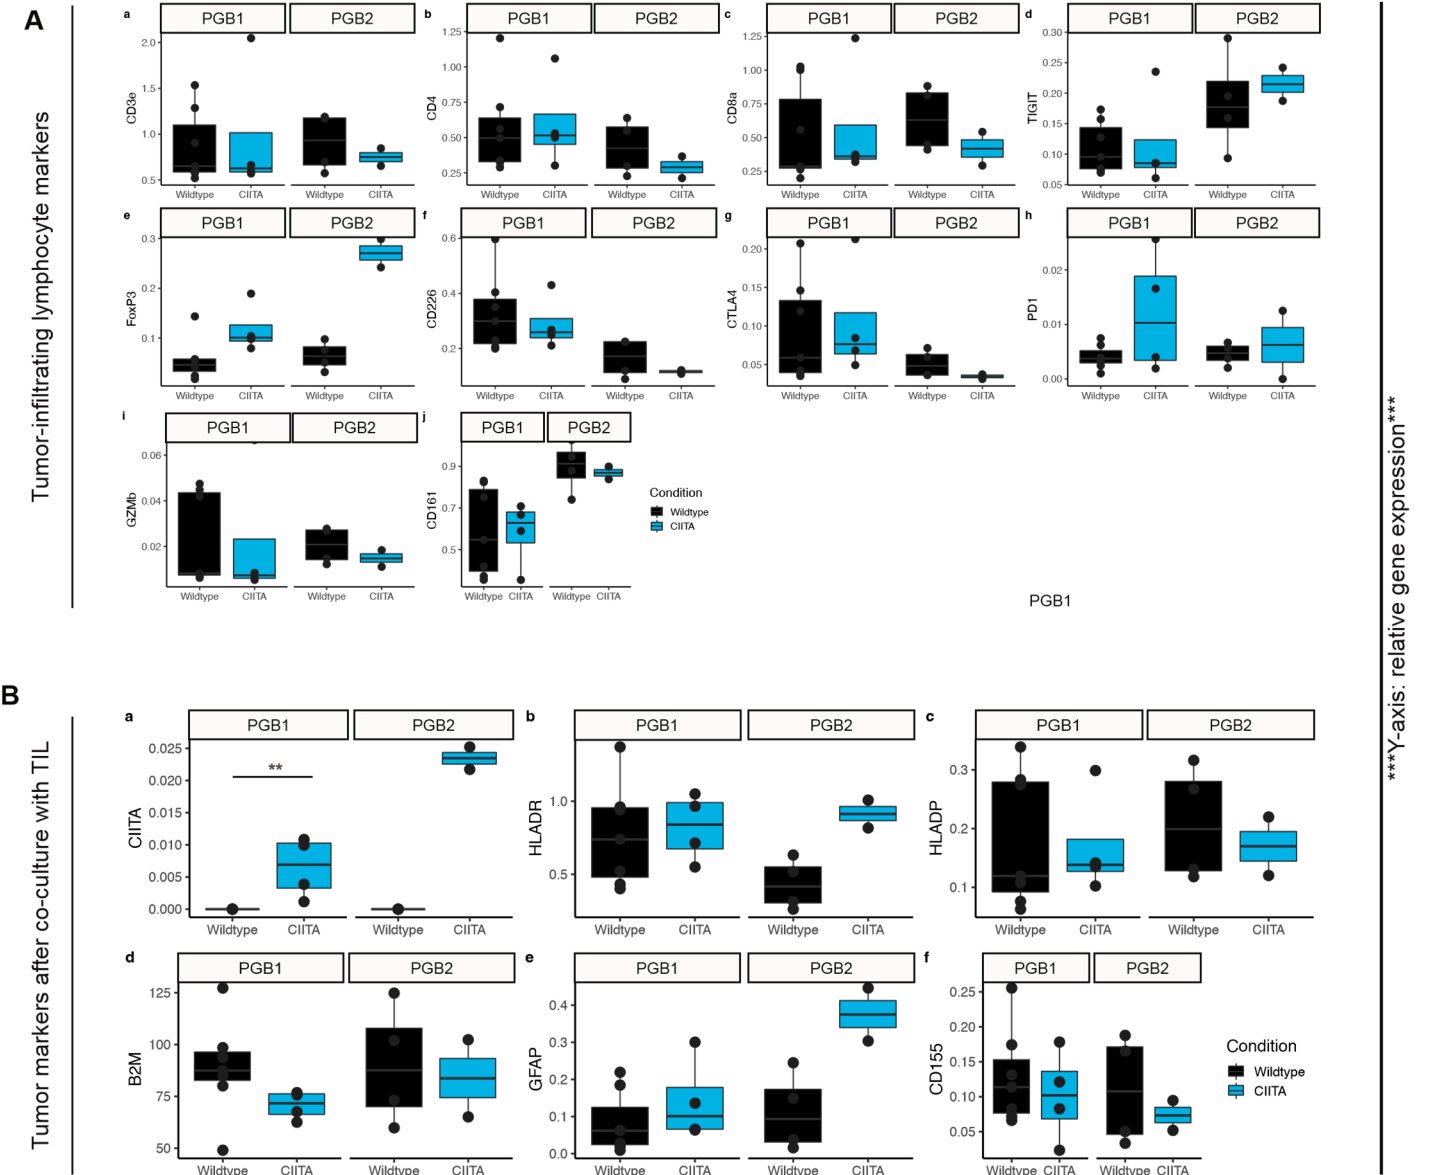

SUPPLEMENTARY TABLE S2. Primers pairs for tested genes.

| Gene                 | Primers sequence          |                         | Gene       | Primers sequence        |                         |
|----------------------|---------------------------|-------------------------|------------|-------------------------|-------------------------|
| General              | Forward                   | Reverse                 | TIL        | Forward                 | Reverse                 |
| CIITA                | GCTGGAGAAGAAGAGAT         | CGCGATATTGGCATAAG       | FoxP3      | CTCAGCTTAGACTGCAGAGGAAC | TTATATGGGGTGATAGTCCAGCA |
| GFAP                 | TGGAGCTCAAATGACCGCTTT     | CCAGGAAGCGGACCTTCTC     | CTLA4      | GGCACCTCCAGTGGAAATCA    | TCAGCACACACATCACCATT    |
| GAPDH                | TGACACCACCACTGCTTAGC      | GGCATGGAAGTGTGTCATGA    | PD1        | ACGAGGGACAATAGGAGCCAG   | GCCCATTCGGCTAGGAAAGAC   |
| RNA-polymerase II    | GTTTTTCCTGCTGTGTAGGG      | TCATTGTTGCTGCTTTGGA     | CD161      | TGCCATGGACCAACAAGCAA    | CCAAGGTGAACCTGACAGA     |
| E2Ubi                | CTGAAGAGAATCCACAAGGAATTGA | CTCCAACAGGACCTGCTGAAC   | NK-cells   |                         |                         |
| TBP                  | CAGCTTCGGAGAGTTCTGGG      | TATATTGCGGCTTTCGGGCA    | CD56       | ACTTATCGACCATGGAGCGC    | AGCTCACAAGGTTCTGCGCT    |
| TAM                  |                           |                         | CD155      | AAAGAGGGACCTCCAGTGA     | GTGGATCCTGGGAAGAGCTG    |
| IBA1                 | AGACGTTCACTACCTGACTT      | GGCCTGTTGGCTTTTCTTTTCTC | CD137L     | GAGCTTTCGCCCCGACGAT     | GTCACTGTACCAGCTCAGGG    |
| CD45                 | GCAGCTAGCAAGTGGTTTGTTC    | AAACAGCATGCGTCTTTTCTC   | DR4        | GTCTGTTGTTGCATCGGCTC    | TGTGAGCAATTGCTCTACGCC   |
| CD68                 | CTTCTCTCAATCCCTATGGACA    | GAAGGACACATTGTACTCCACC  | DR5        | TCCTGAGATGTGCCGGAAGT    | CCACTGTGCTTTGTACCTGATTG |
| HLA-DR               | CCCAGGGAAGACCACTTTT       | CACCCTGCAGTCGTAAACGT    | FAS        | GAACACTGTGACCTTGCAC     | AAGACAAAGCCACCCCAAGT    |
| CD163                | TTTGTCAACTTGAGTCCCTTCAC   | TCCCGCTACACTTGTTCAC     | MICA       | GCTGGCATCTTCCCTTTTGC    | CTGCACAGATCCATCCAGG     |
| CD206                | TGCAGAAGCAACCAACCTGTAA    | CAGGCCCTTAAGCAACGAAACT  | OX40L      | TCTGCCTGCACTTCTCTGC     | CCTCCTTTTGGGAAGTGAGGA   |
| IL-1b                | TTTGAGTCTGCCAGTTCCC       | TCAGTTATATCTGGCCGCC     | CD16       | GACAGCGGCTCCTACTTCT     | ATGGTTGACACTGCCAAACCT   |
| IL-6                 | TGCAATAACCAACCCCTGACC     | TGCGCAGAAATGAGATGAGTTG  | CD69       | TGCATCCGGAGAGTGGACAA    | CACACAGGACAGGAACCTGGA   |
| IL-10                | GGCGCTGTCAATGATTTCTTC     | CACTCATGGCTTTGTAGATGCC  | CD2        | GGCAGCCTCTTGTATGTTCTT   | CTGTGGGCTCTTGTCTCCAG    |
| TNF-alpha            | TGGAGAAGGGTGACCGACTC      | TCACAGGGCAATGATCCCAA    | CD96       | GACCTCCAGTGGGACAGATAC   | CATGAAGTGTGAGCCTGCAC    |
| TGF-beta             | CAATTCTCGCGATACCTCAG      | GCACAACTCCGGTGACATCAA   | LAMP1      | GTAACGCTCCATGATGCCAC    | CTGCTTGTTCACAGCGTGTG    |
| Beta-2-microglobulin | GTGCTCGCGTACTCTCTCT       | TCAATGTGCGATGGATGAAA    | CD137      | ACGCTCCGTTTCTCTGTTGT    | GAAATCGGCAGCTACAGCCA    |
| TIL                  |                           |                         | NCR1       | CATCTATCGGGTTGGGAGC     | CGAGATCACTTCGGGTCCAG    |
| CD3e                 | TATCAGTTGGCGTTTGGGGG      | TCCAGGATACTGAGGGCATGT   | TIGIT      | TGGGACGTACACTGGGAGAA    | TGGCTCCAAGCAATGGAATCT   |
| CD4                  | TGCTGAGTGACTCGGGACAG      | CCAGCACAATCAGGGCCATTG   | CD226      | TTAGAGCGAGCAGCACTCAC    | TGCCAAAGCACTCTTCACA     |
| CD8a                 | ACTTGTGGGGTCTCTCTCT       | GTCTCCCGATTTGACCACAG    | Granzyme B | TGGGGGACCCAGAGATTAATA   | TTTCGTCCATAGGAGACAATGC  |



SUPPLEMENTARY FIGURE S5. (a) RNA sequencing data showing HLA-I and -II expression in human glioblastoma cell lines. (b) Survival of patients with high (>0%) and no (0%) CIITA expression. (c) Survival curve of patients with high (>0%) or no (0%) HLA-DRA expression. (d) Survival curve from TCGA database patients with highest 90 and lowest 10th percentile and (e) highest 75 and lowest 25th percentile. (f) Caspase 3/7 apoptosis assay in NK cell co-culture experiments. (g) Percentage of cells in apoptosis per time point, GM2-WT versus -CIITA.

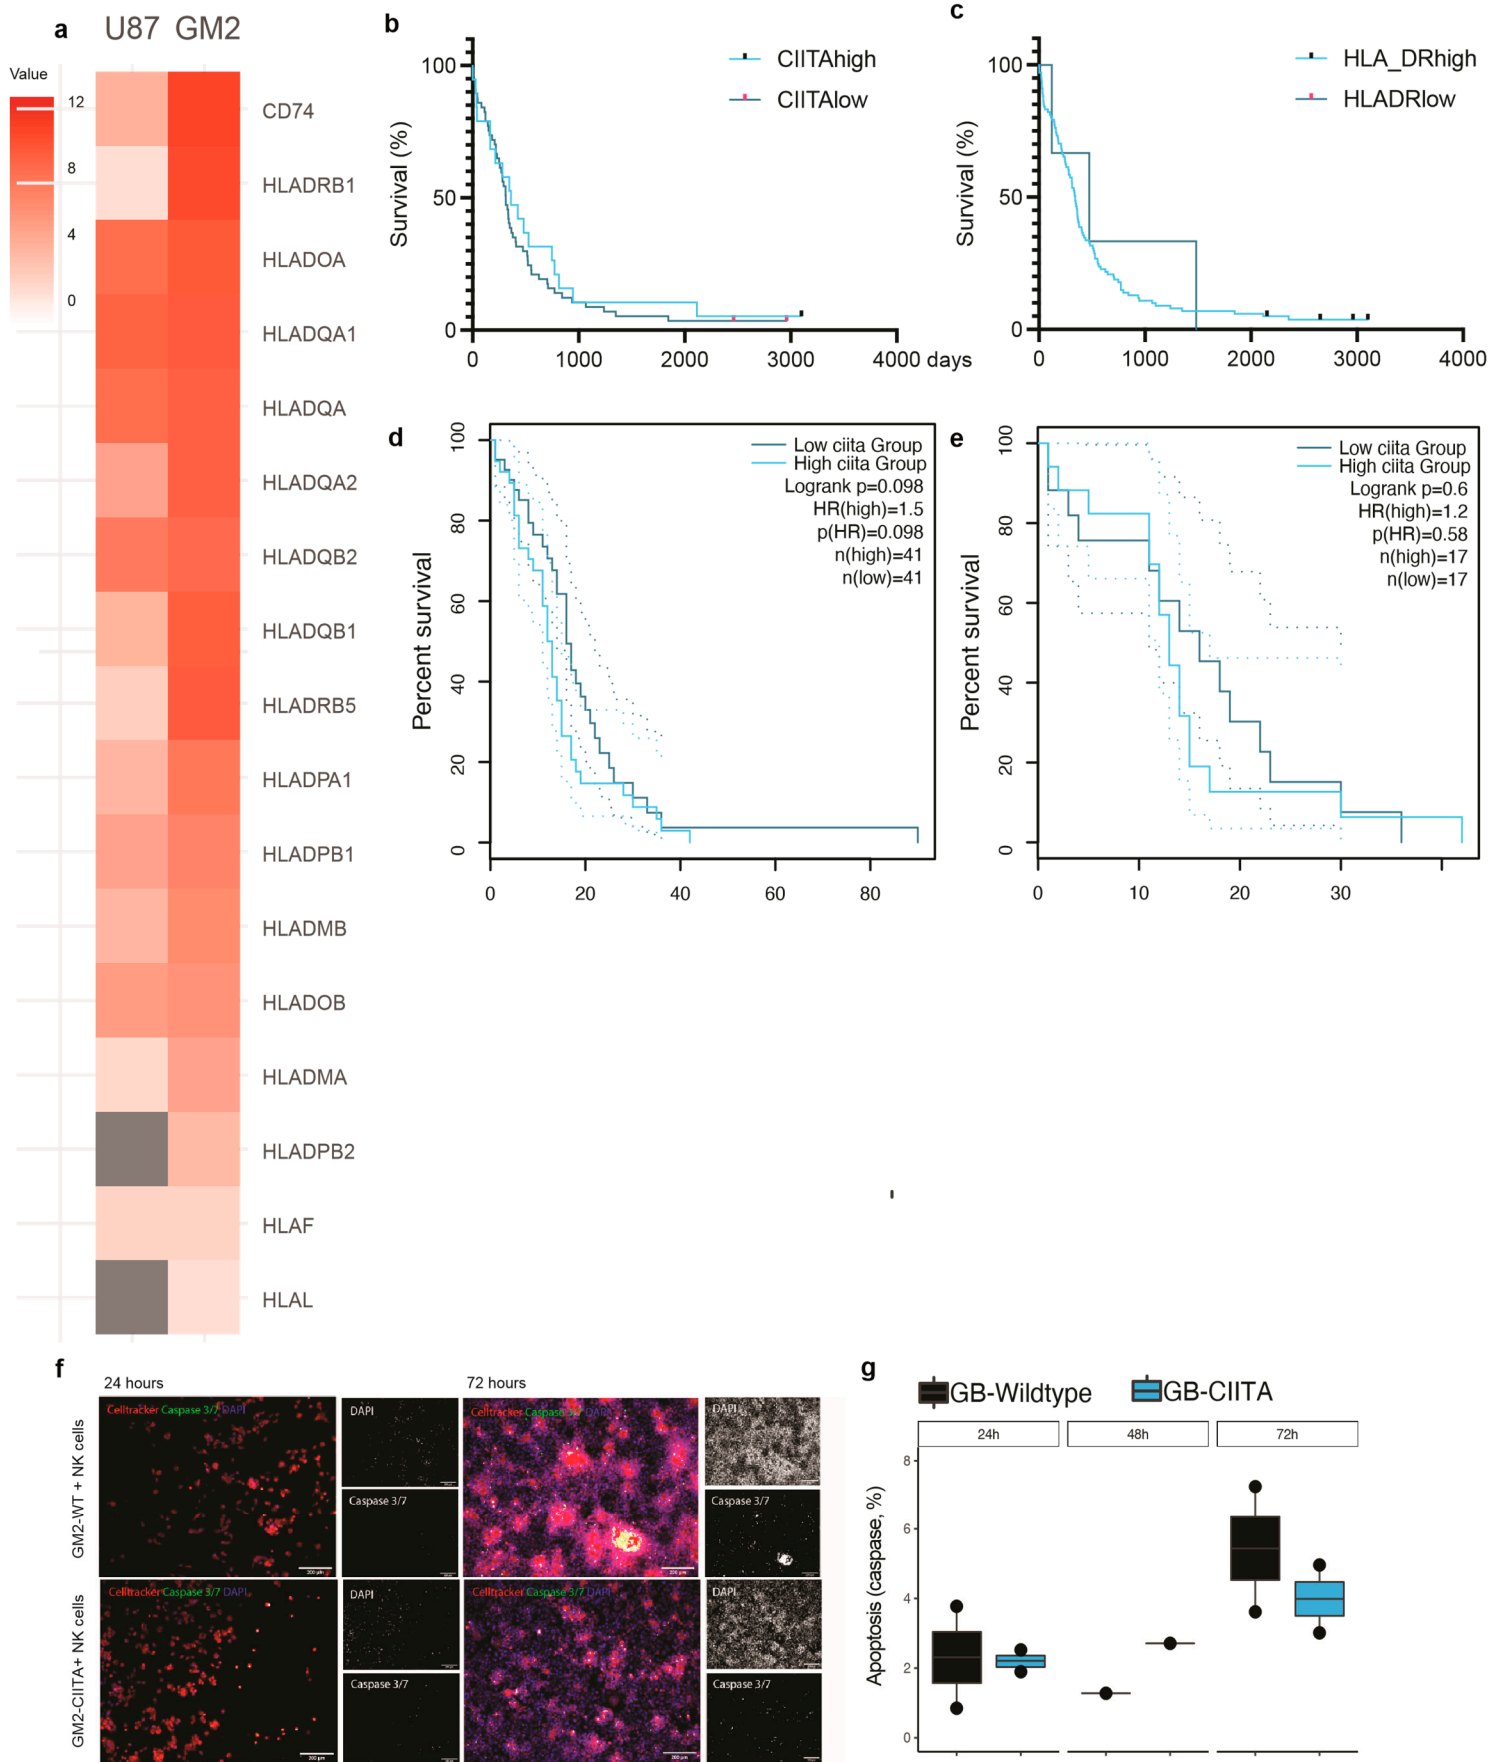

Supplement: s1 [file s1]
